# Supplementary material for: Determination of polysulfide anions and molecular sulfur via coupling HPLC with ICP-MS
Source: Royal Society of Chemistry journal article supplement (doi:10.1039/d4ja00231h), 2024-01-01
Supplement: d4ja00231h1.pdf [file d4ja00231h1.pdf]

## Supplementary information:

### Determination of polysulfide anions and molecular sulfur via coupling HPLC with ICP-MS

**Aleksei Sadykov<sup>a, b</sup>, Yannick P. Stenzel<sup>a</sup>, Martin Winter<sup>a, c</sup>, Simon Wiemers-Meyer<sup>a</sup>, Sascha Nowak<sup>a\*</sup>**

<sup>a</sup> MEET Battery Research Center, Institute of Physical Chemistry, University of Münster

Corrensstr. 46, 48149 Münster, Germany

<sup>b</sup> International Graduate School for Battery Chemistry, Characterization, Analysis, Recycling and Application (BACCARA), University of Münster

Corrensstr. 40, 48149 Münster, Germany

<sup>c</sup> Helmholtz Institute Münster, IEK-12, Forschungszentrum Jülich GmbH

Corrensstr. 46, 48149 Münster, Germany

\* Corresponding author

## SI tables and figures

| R-X                                                                    | derivatization | UV-Vis peaks after chromatographic separation |
|------------------------------------------------------------------------|----------------|-----------------------------------------------|
| CH <sub>3</sub> -OTf                                                   | fast           | present                                       |
| C <sub>6</sub> H <sub>5</sub> CH <sub>2</sub> -Cl                      | slow           | present                                       |
| (CH <sub>3</sub> ) <sub>2</sub> N-C <sub>6</sub> H <sub>5</sub> -CO-Cl | fast           | present with double peaks                     |
| C <sub>6</sub> H <sub>5</sub> SO <sub>2</sub> -Cl                      | not observed   | not observed                                  |

Table S1: Qualitative description of derivatization with several derivatizing agents. Derivatization efficiency was described by the loss of the color of the polysulfide mixture

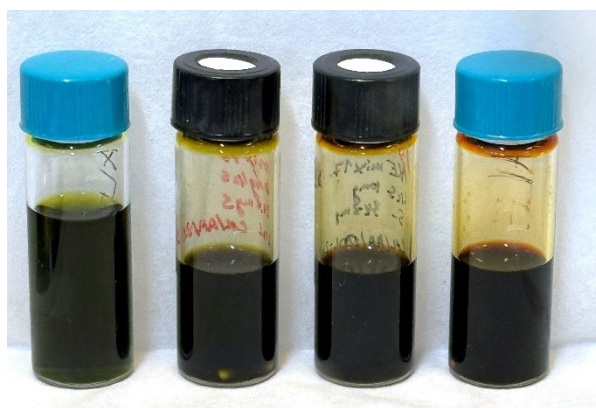

Fig. S1: Photo of 0.11 M lithium polysulfide samples in the mixed solvent ( $\epsilon$ -caprolactam : acetamide : 1,3-dioxolane = 1:1:3 wt.). From left to right: Li<sub>2</sub>S<sub>4</sub>, Li<sub>2</sub>S<sub>5</sub>, Li<sub>2</sub>S<sub>6</sub>, Li<sub>2</sub>S<sub>8</sub>.

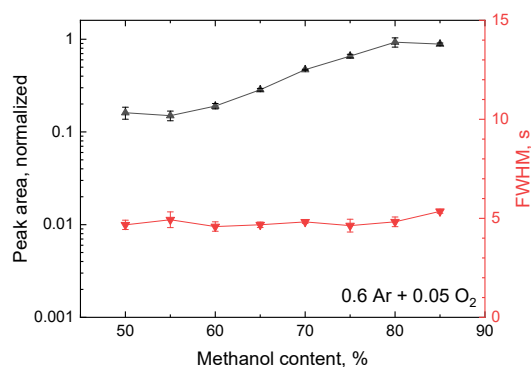

Fig. S2: Signal response measured as peak area and normalized to the maximal value for different methanol contents and peak width over methanol content for Ar-O<sub>2</sub> gas mixture (0.65 L min<sup>-1</sup> and 0.05 L min<sup>-1</sup>, correspondingly).

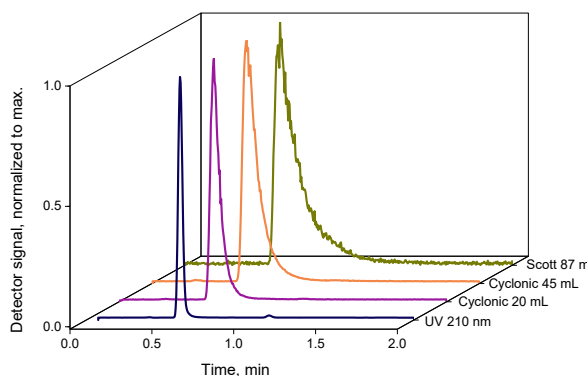

Fig. S3. HPLC-ICP-MS chromatograms of Me<sub>2</sub>S acquired using different spray chambers, UV signal at 210 nm shown for comparison. Measurements were conducted using eluent flow of 0.5 mL min<sup>-1</sup> and sample gas flow of 0.7 L min<sup>-1</sup> with 55 % (v/v) methanol-water mixture as eluent. Different spray chambers were compared:

- Borosilicate cyclonic spray chamber (20 mL)
- Cyclonic quartz spray chamber (45 mL)
- Quartz double pass spray chamber (87 mL)

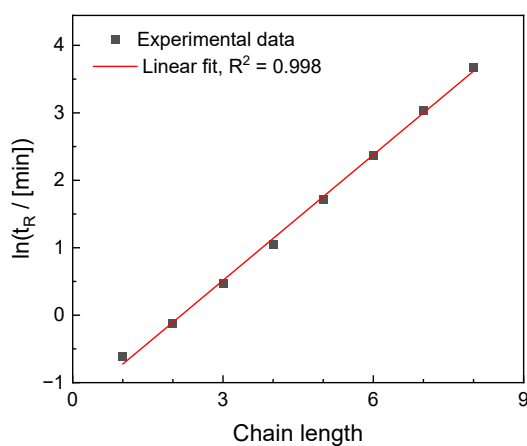

Fig. S4:  $\ln(t_R)$  versus chain length of the observed chromatography peaks of dimethyl polysulfides.
